# Supplementary material
Source: PubMed Central journal article supplement (PMC6537799)
Supplement: jamacardiol-4-556-s001.pdf [file jamacardiol-4-556-s001.pdf]

## Supplementary Online Content

Abraham J, Bharmi R, Jonsson O, et al. Association of ambulatory hemodynamic monitoring with clinical outcomes in a concurrent matched control analysis. *JAMA Cardiol*. Published online May 15, 2019. doi:10.1001/jamacardio.2019.1384

**eTable 1.** Billing Procedure Codes Used to Identify PAP Sensor Implants

**eTable 2.** Diagnoses Codes Used to Identify Comorbidities

**eTable 3.** Billing Codes Used to Identify HF Hospitalization

**eTable 4.** Baseline Patient Characteristics: All Elixhauser Comorbidities that were not used for Matching criteria

**eFigure 1.** Algorithm for Matched Patient Identification

**eFigure 2.** Patient Cohort Identification

**eFigure 3.** Propensity score Match comparison

**eFigure 4.** Clinical outcomes (Heart Failure Hospitalizations and Mortality) in Subgroups of Interest in the 12-months after PA pressure sensor implant

**eFigure 5.** Distribution of outcomes amongst all matches

**eFigure 6.** Distribution of outcomes in patients treated at CMEM implanting sites

This supplementary material has been provided by the authors to give readers additional information about their work.

**eTable 1. Billing Procedure Codes Used to Identify PAP Sensor Implants**

|                      | Billing Codes | Description                                                                                                                                                                                        |
|----------------------|---------------|----------------------------------------------------------------------------------------------------------------------------------------------------------------------------------------------------|
| Inpatient Implants   |               |                                                                                                                                                                                                    |
| ICD-9-CM Proc. Code  | 38.26         | Insertion of implantable pressure sensor without lead for intracardiac or great vessel hemodynamic monitoring                                                                                      |
| ICD-10-CM Proc. Code | 02HQ30Z       | Insertion of Pressure Sensor Monitoring Device into Right Pulmonary Artery, Percutaneous Approach                                                                                                  |
|                      | 02HR30Z       | Insertion of Pressure Sensor Monitoring Device into Left Pulmonary Artery, Percutaneous Approach                                                                                                   |
| Outpatient Implants  |               |                                                                                                                                                                                                    |
| CPT code             | C9741         | Right heart catheterization with implantation of wireless pressure sensor in the pulmonary artery, including any type of measurement, angiography, imaging supervision, interpretation, and report |
|                      | C2624         | Implantable wireless pulmonary artery pressure sensor with delivery catheter, including all system components                                                                                      |

**eTable 2. Diagnoses Codes Used to Identify Comorbidities**

| <b>Comorbidities</b>                            | <b>ICD-9-CM</b>                                                                                                                         | <b>ICD-10</b>                                                                                                                                                                                           |
|-------------------------------------------------|-----------------------------------------------------------------------------------------------------------------------------------------|---------------------------------------------------------------------------------------------------------------------------------------------------------------------------------------------------------|
| Cardiac Arrhythmias                             | 426.0, 426.13, 426.7, 426.9, 426.10, 426.12, 427.0–427.4, 427.6–427.9, 785.0, 996.01, 996.04, V45.0, V53.3                              | I44.1–I44.3, I45.6, I45.9, I47.x–I49.x, R00.0, R00.1, R00.8, T82.1, Z45.0, Z95.0                                                                                                                        |
| Diabetes                                        | 250.0–250.3, 250.4–250.9                                                                                                                | E08.0, E08.1, E09.0, E09.1, E09.9, O24.0–O24.3, O24.8–O24.9, E10.0–E10.9, E11.0–E11.9, E12.0–E12.9, E13.0–E13.9, E14.0–E14.9, P70.2                                                                     |
| Hypertension                                    | 401.x, 402.x–405.x                                                                                                                      | I10.x, I11.x–I13.x, I15.x, O10.x, O11.x, O16.x                                                                                                                                                          |
| Renal Failure                                   | 403.01, 403.11, 403.91, 404.02, 404.03, 404.12, 404.13, 404.92, 404.93, 585.x, 586.x, 588.0, V42.0, V45.1, V56.x                        | N18.x, N19.x, Z49.0x, Z49.3x, Z91.15, Z94.0, Z99.2                                                                                                                                                      |
| Chronic Pulmonary Disease                       | 490–496, 500–505, 506.4                                                                                                                 | J40.x–J47.x, J60.x–J67.x, J68.4                                                                                                                                                                         |
| Valvular Disease                                | 093.2, 394.x–397.x, 424.x, 746.3–746.6, V42.2, V43.3                                                                                    | A52.0, I05.x–I08.x, I09.1, I09.8, I34.x–I39.x, Q23.0–Q23.3, Z95.2–Z95.4                                                                                                                                 |
| Peripheral Vascular Disorder                    | 093.0, 437.3, 440.x, 441.x, 443.1–443.9, 447.1, 557.1, 557.9, V43.4                                                                     | I70.x, I71.x, I72.x, I73.1, I73.8, I73.9, I77.1, I79.0, I79.1, I79.8, K55.1, K55.8, K55.9, Z95.8                                                                                                        |
| Pulmonary Circulation Disorders                 | 415.0, 415.1, 416.x, 417.0, 417.8, 417.9                                                                                                | I26.x, I27.x, I28.9                                                                                                                                                                                     |
| Paralysis                                       | 334.1, 342.x, 343.x, 344.0–344.6, 344.9                                                                                                 | G04.1, G80.0–G80.2, G81.x, G82.x, G83.0–G83.4, G83.5, G83.8, G83.9, I69.x, R532                                                                                                                         |
| Other neurological disorders                    | 331.9, 332.0, 332.1, 333.4, 333.5, 333.92, 334.x–335.x, 336.2, 340.x, 341.x, 345.x, 348.1, 348.3, 780.3, 784.3                          | E75.x, G10.x–G13.x, G20.x–G21.x, G24.x, G25.4, G25.5, G25.81, G31.2, G31.8, G31.9, G32.x, G35.x–G37.x, G40.x, G47.x, G80.0, G89.0, G91.x, G93.1, G93.4, G93.8, G93.9, G94, R41.0, R41.82, R47.01, R56.x |
| Hypothyroidism                                  | 240.9, 243.x, 244.x, 246.1, 246.8                                                                                                       | E00.x–E03.x, E89.0                                                                                                                                                                                      |
| Liver Disease                                   | 070.22, 070.23, 070.32, 070.33, 070.44, 070.54, 070.6, 070.9, 456.0–456.2, 570.x, 571.x, 572.2–572.8, 573.3, 573.4, 573.8, 573.9, V42.7 | B18.x, I85.x, K70.x, K72.x–K74.x, K76.0, K76.2–K76.9, Z94.4                                                                                                                                             |
| Peptic ulcer disease excluding bleeding         | 531.7, 531.9, 532.7, 532.9, 533.7, 533.9, 534.7, 534.9                                                                                  | K25.4–K25.7, K25.9, K26.4–K26.7, K26.9, K27.4–K27.7, K27.9, K28.4–K28.7, K28.9                                                                                                                          |
| Acquired immune deficiency syndrome             | 042.x–044.x                                                                                                                             | B20                                                                                                                                                                                                     |
| Lymphoma                                        | 200.x–202.x, 203.0, 238.6                                                                                                               | C81.x–C85.x, C86.x, C88.x, C90.x, C96.x, D47.Z9                                                                                                                                                         |
| Metastatic cancer                               | 196.x–199.x                                                                                                                             | C77.x–C80.x, C7B.x                                                                                                                                                                                      |
| Solid tumor without metastasis                  | 140.x–172.x, 174.x–195.x                                                                                                                | C00.x–C26.x, C30.x–C34.x, C37.x–C41.x, C43.x, C45.x–C58.x, C60.x–C76.x, C7A.x, D03.x, E31.x                                                                                                             |
| Rheumatoid arthritis/collagen vascular diseases | 446.x, 701.0, 710.0–710.4, 710.8, 710.9, 711.2, 714.x, 719.3, 720.x, 725.x, 728.5, 728.89, 729.30                                       | L94.0, L94.1, L94.3, M05.x, M06.x, M08.x, M12.0, M32.x–M35.x, M45.x,                                                                                                                                    |

|                                                |                                                                                                      |                                                                                                         |
|------------------------------------------------|------------------------------------------------------------------------------------------------------|---------------------------------------------------------------------------------------------------------|
|                                                |                                                                                                      | M46.0, M46.1, M46.5, M46.8, M46.9, M48.8x, M49.x                                                        |
| Coagulopathy                                   | 286.x, 287.1, 287.3–287.5                                                                            | D65–D68.x, D69.1, D69.3–D69.6, O99.1x                                                                   |
| Obesity                                        | 278.0                                                                                                | E66.x, O99.2x, R939, Z68.3x-Z68.5x                                                                      |
| Weight Loss                                    | 260.x–263.x, 783.2, 799.4                                                                            | E40.x–E46.x, R63.4, R63.6                                                                               |
| Fluid and Electrolyte disorders                | 253.6, 276.x                                                                                         | E86.x, E87.x                                                                                            |
| Blood Loss                                     | 280.0                                                                                                | D50.0, O90.81, O99.0x                                                                                   |
| Deficiency Anemia or Chronic blood loss anemia | 280.1–280.9, 281.x                                                                                   | D50.1, D50.8, D50.9, D51.x–D53.x, D63.x, D64.9                                                          |
| Alcohol Abuse                                  | 265.2, 291.1–291.3, 291.5–291.9, 303.0, 303.9, 305.0, 357.5, 425.5, 535.3, 571.0–571.3, 980.x, V11.3 | F10.x                                                                                                   |
| Drug Abuse                                     | 292.x, 304.x, 305.2–305.9, V65.42                                                                    | F11.x–F16.x, F18.x, F19.x, F55.x, O99.32x                                                               |
| Psychoses                                      | F11.x–F16.x, F18.x, F19.x, F55.x, O99.32x                                                            | F20.x, F22.x–F25.x, F28.x, F29.x, F30.x, F31.x, F32.4, F32.5, F33.4x, F34.8x, F34.9, F39, F44.89, F84.3 |
| Depression                                     | 296.2, 296.3, 296.5, 300.4, 309.x, 311                                                               | F32.x, F33.x, F34.1, F41.2, F43.21                                                                      |
| Chronic Ischemic Heart Disease                 | 414.xx                                                                                               | I25.xx                                                                                                  |

*Coding based on Moore BJ, White S, Washington R, Coenen N, Elixhauser A. Identifying increased risk of readmission and in-hospital mortality using hospital administrative data: The AHRQ Elixhauser Comorbidity index. Med Care. 2017 Jul; 55(7):698-705 and HCSRN: Health care systems research network [http://hcsrn.org/sas/standard\\_macros.sas](http://hcsrn.org/sas/standard_macros.sas)*

**eTable 3. Billing Codes Used to Identify HF Hospitalization**

| ICD-9 CODE | ICD-9 CODE DESCRIPTION                                                                                                                                  | ICD-10 CODE | ICD-10 CODE DESCRIPTION                                                                                                                                    |
|------------|---------------------------------------------------------------------------------------------------------------------------------------------------------|-------------|------------------------------------------------------------------------------------------------------------------------------------------------------------|
| 402.01     | Malignant hypertensive heart disease with heart failure                                                                                                 | I110        | Hypertensive heart disease with heart failure                                                                                                              |
| 402.11     | Benign hypertensive heart disease with heart failure                                                                                                    | I110        | Hypertensive heart disease with heart failure                                                                                                              |
| 402.91     | Unspecified hypertensive heart disease with heart failure                                                                                               | I110        | Hypertensive heart disease with heart failure                                                                                                              |
| 404.01     | Hypertensive heart and chronic kidney disease, malignant, with heart failure and with chronic kidney disease stage I through stage IV, or unspecified   | I130        | Hypertensive heart and chronic kidney disease with heart failure and stage 1 through stage 4 chronic kidney disease, or unspecified chronic kidney disease |
| 404.11     | Hypertensive heart and chronic kidney disease, benign, with heart failure and with chronic kidney disease stage I through stage IV, or unspecified      | I130        | Hypertensive heart and chronic kidney disease with heart failure and stage 1 through stage 4 chronic kidney disease, or unspecified chronic kidney disease |
| 404.91     | Hypertensive heart and chronic kidney disease, unspecified, with heart failure and with chronic kidney disease stage I through stage IV, or unspecified | I130        | Hypertensive heart and chronic kidney disease with heart failure and stage 1 through stage 4 chronic kidney disease, or unspecified chronic kidney disease |
| 404.03     | Hypertensive heart and chronic kidney disease, malignant, with heart failure and with chronic kidney disease stage V or end stage renal disease         | I132        | Hypertensive heart and chronic kidney disease with heart failure and with stage 5 chronic kidney disease, or end stage renal disease                       |
| 404.13     | Hypertensive heart and chronic kidney disease, benign, with heart failure and chronic kidney disease stage V or end stage renal disease                 | I132        | Hypertensive heart and chronic kidney disease with heart failure and with stage 5 chronic kidney disease, or end stage renal disease                       |
| 404.93     | Hypertensive heart and chronic kidney disease, unspecified, with heart failure and chronic kidney disease stage V or end stage renal disease            | I132        | Hypertensive heart and chronic kidney disease with heart failure and with stage 5 chronic kidney disease, or end stage renal disease                       |
| 428.0      | Congestive heart failure, unspecified                                                                                                                   | I509        | Heart failure, unspecified                                                                                                                                 |
| 428.9      | Heart failure, unspecified                                                                                                                              | I509        | Heart failure, unspecified                                                                                                                                 |
| 428.1      | Left heart failure                                                                                                                                      | I501        | Left ventricular failure                                                                                                                                   |
| 428.20     | Systolic heart failure, unspecified                                                                                                                     | I5020       | Unspecified systolic (congestive) heart failure                                                                                                            |
| 428.21     | Acute systolic heart failure                                                                                                                            | I5021       | Acute systolic (congestive) heart failure                                                                                                                  |
| 428.22     | Chronic systolic heart failure                                                                                                                          | I5022       | Chronic systolic (congestive) heart failure                                                                                                                |
| 428.23     | Acute on chronic systolic heart failure                                                                                                                 | I5023       | Acute on chronic systolic (congestive) heart failure                                                                                                       |

|        |                                                                |       |                                                                                          |
|--------|----------------------------------------------------------------|-------|------------------------------------------------------------------------------------------|
| 428.30 | Diastolic heart failure, unspecified                           | I5030 | Unspecified diastolic (congestive) heart failure                                         |
| 428.31 | Acute diastolic heart failure                                  | I5031 | Acute diastolic (congestive) heart failure                                               |
| 428.32 | Chronic diastolic heart failure                                | I5032 | Chronic diastolic (congestive) heart failure                                             |
| 428.33 | Acute on chronic diastolic heart failure                       | I5033 | Acute on chronic diastolic (congestive) heart failure                                    |
| 428.40 | Combined systolic and diastolic heart failure, unspecified     | I5040 | Unspecified combined systolic (congestive) and diastolic (congestive) heart failure      |
| 428.41 | Acute combined systolic and diastolic heart failure            | I5041 | Acute combined systolic (congestive) and diastolic (congestive) heart failure            |
| 428.42 | Chronic combined systolic and diastolic heart failure          | I5042 | Chronic combined systolic (congestive) and diastolic (congestive) heart failure          |
| 428.43 | Acute on chronic combined systolic and diastolic heart failure | I5043 | Acute on chronic combined systolic (congestive) and diastolic (congestive) heart failure |

**eTable 4. Baseline Patient Characteristics: All Elixhauser Comorbidities that were not used for Matching criteria**

| <b>Comorbidities — no. (%)</b>                  | <b>Treatment Cohort</b> | <b>Control Cohort</b> | <b>p-value</b> |
|-------------------------------------------------|-------------------------|-----------------------|----------------|
| Valvular Disease                                | 471 (43.3)              | 475 (43.7)            | 0.90 NS        |
| Peripheral Vascular Disorder                    | 308 (28.3)              | 279 (25.7)            | 0.18 NS        |
| Pulmonary Circulation Disorders                 | 318 (29.3)              | 330 (30.4)            | 0.61 NS        |
| Paralysis                                       | n < 11                  | n < 11                | 0.60 NS        |
| Other neurological disorders                    | 101 (9.3)               | 79 (7.3)              | 0.10 NS        |
| Hypothyroidism                                  | 277 (25.5)              | 285 (16.2)            | 0.72 NS        |
| Liver Disease                                   | 71 (6.5)                | 94 (8.6)              | 0.08 NS        |
| Peptic ulcer disease excluding bleeding         | 24 (2.2)                | 27 (2.5)              | 0.78 NS        |
| Acquired immune deficiency syndrome             | n < 11                  | n < 11                | 0.45 NS        |
| Lymphoma                                        | 19 (1.7)                | 19 (1.7)              | 1.00 NS        |
| Metastatic cancer                               | 15 (1.4)                | 10 (0.9)              | 0.42 NS        |
| Solid tumor without metastasis                  | 90 (8.3)                | 66 (6.1)              | 0.06 NS        |
| Rheumatoid arthritis/Collagen vascular diseases | 60 (5.5)                | 61 (5.6)              | 1.00 NS        |
| Coagulopathy                                    | 125 (11.5)              | 116 (10.7)            | 0.59 NS        |
| Obesity                                         | 339 (31.2)              | 325 (29.9)            | 0.55 NS        |
| Weight Loss                                     | 73 (6.7)                | 79 (7.3)              | 0.67 NS        |
| Fluid and Electrolyte disorders                 | 507 (46.6)              | 541 (49.8)            | 0.16 NS        |
| Blood Loss                                      | 26 (2.4)                | 22 (2.0)              | 0.66 NS        |
| Deficiency Anemia or Chronic blood loss anemia  | 157 (14.4)              | 149 (13.7)            | 0.67 NS        |
| Alcohol Abuse                                   | 40 (3.7)                | 52 (4.8)              | 0.24 NS        |
| Drug Abuse                                      | 31 (2.9)                | 37 (3.4)              | 0.54 NS        |
| Psychoses                                       | 20 (1.8)                | 30 (2.8)              | 0.20 NS        |
| Depression                                      | 218 (20.1)              | 220 (20.2)            | 0.96 NS        |

*NS—nonsignificant*

*p-values for all comorbidities from Chi-square test*

## eFigure 1. Algorithm for Matched Patient Identification

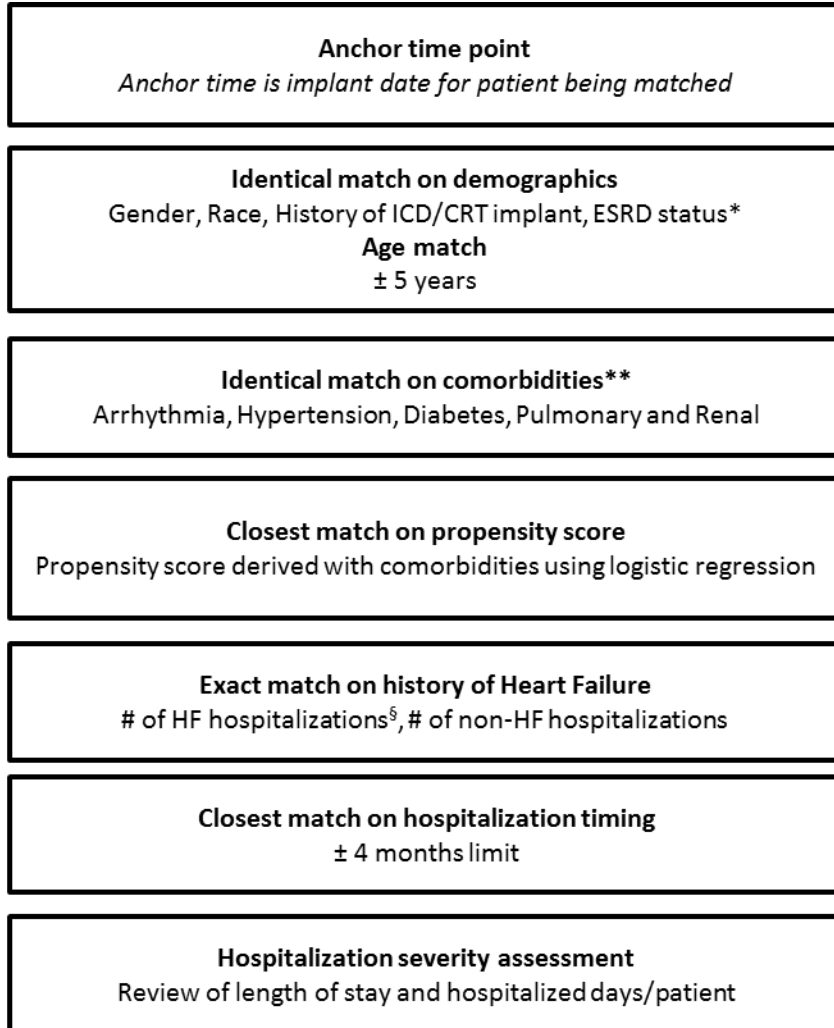

\*ESRD = End stage Renal Disease status from Medicare Status Code

\*\* Comorbidities based on AHRQ Elixhauser Comorbidities. Details in Supplementary Table 2

<sup>§</sup> HF hospitalizations identified using diagnoses codes detailed in Supplementary Table 3



**eFigure 2. Patient Cohort Identification**

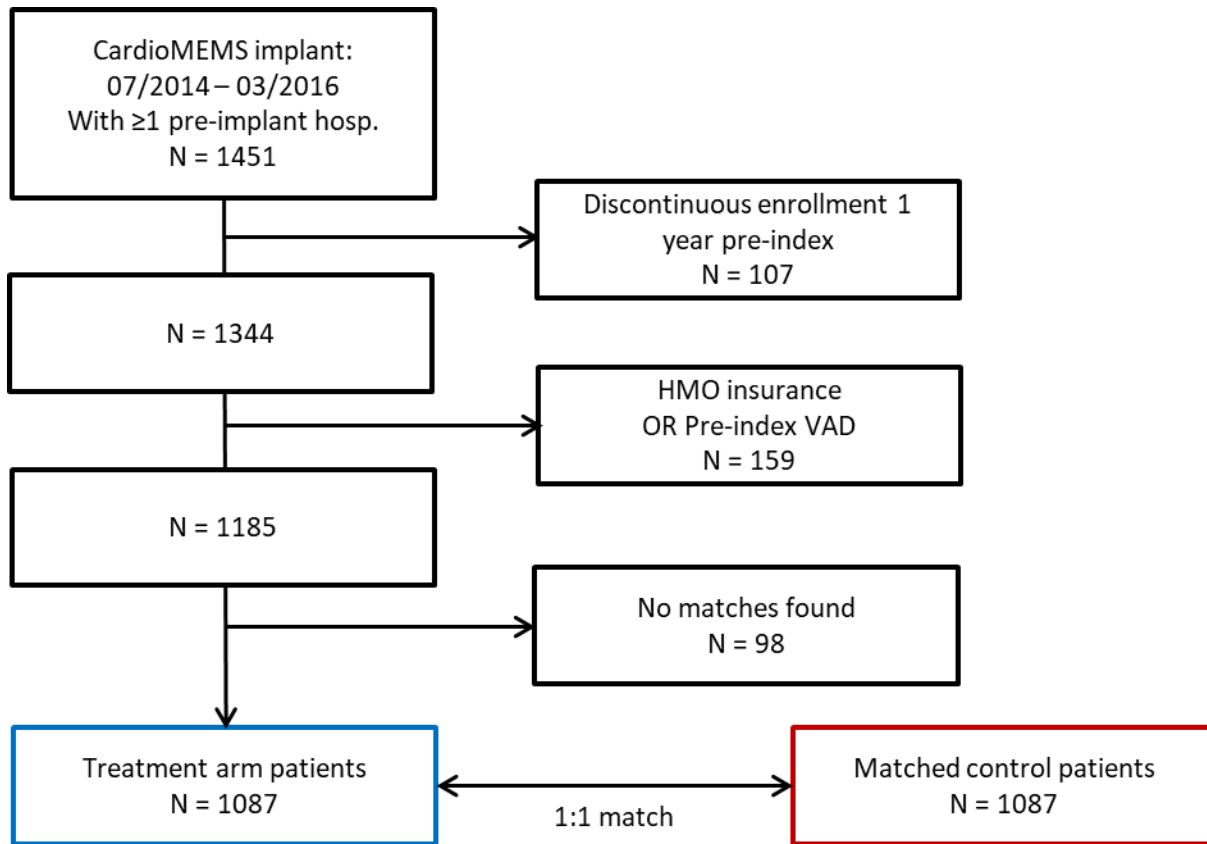

**eFigure 3. Propensity score Match comparison**

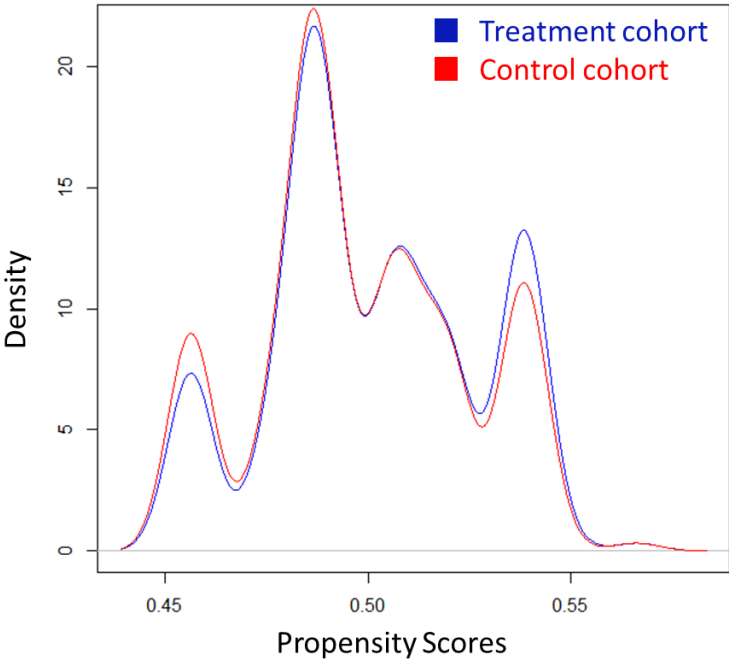

*Propensity score based on history of Arrhythmia, Hypertension, Diabetes, Pulmonary and Renal*

**eFigure 4. Clinical outcomes (Heart Failure Hospitalizations and Mortality) in Subgroups of Interest in the 12-months after PA pressure sensor implant**

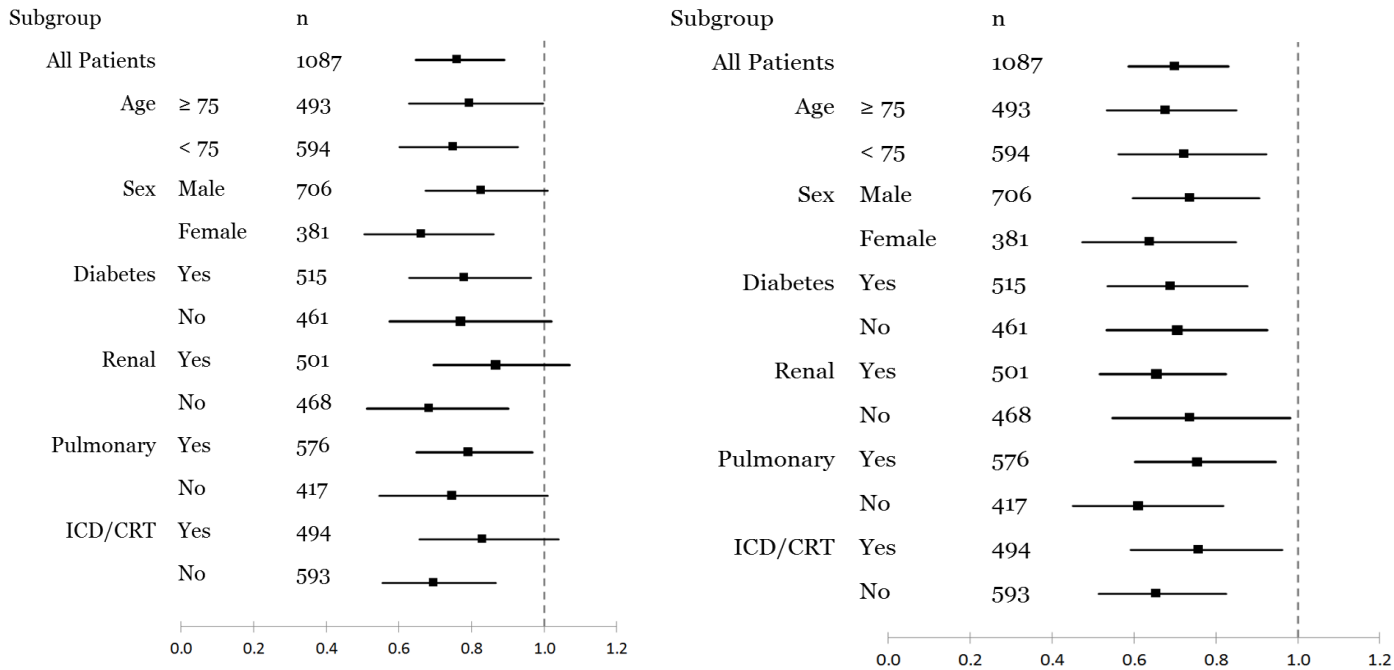

**S4a. Hazard ratio for HFH (Treatment vs. Control)**

**S4b. Hazard ratio for Mortality (Treatment vs. Control)**

*Hazard ratio derived from Andersen-Gill extension to the cox proportional hazards model*

eFigure 5. Distribution of outcomes amongst all matches

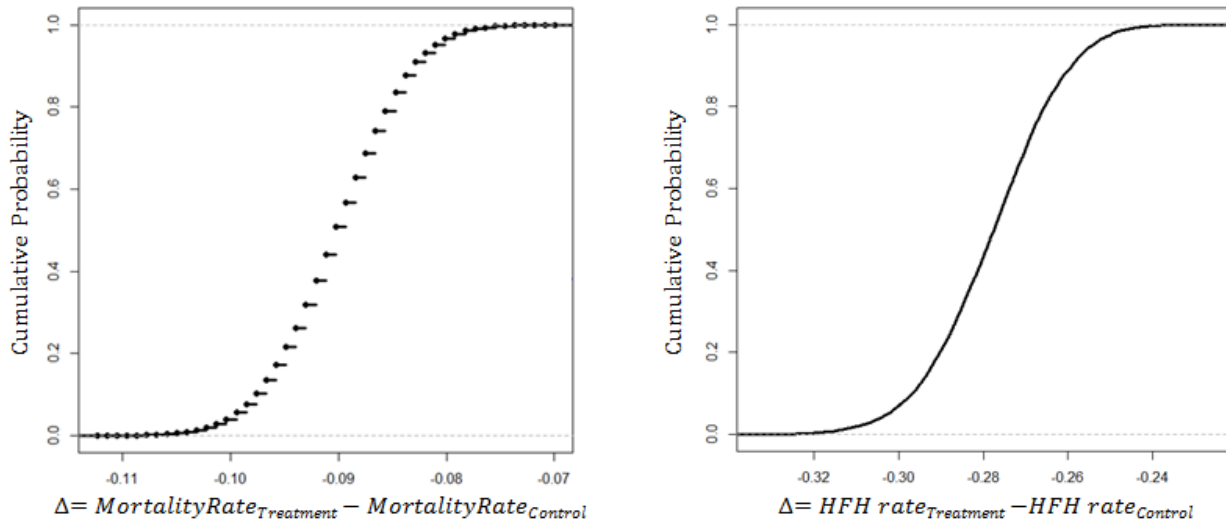

| Comparative Effectiveness of PAP Sensor-Based Management: Bootstrap Model |                                |                                     |                     |          |
|---------------------------------------------------------------------------|--------------------------------|-------------------------------------|---------------------|----------|
| Primary Endpoints                                                         | Treatment Cohort<br>(n = 1087) | Control Cohort [IQR]<br>(n= 41,347) | Relative Risk [IQR] | p-value  |
| HF Hospitalization — HFH/yr                                               | 0.65                           | 0.93 [0.90 0.95]                    | 0.70 [0.68 0.72]    | p < 0.01 |
| Mortality — Death/yr                                                      | 0.22                           | 0.31 [0.30 0.32]                    | 0.71 [0.69 0.73]    | p < 0.01 |

eFigure 6. Distribution of outcomes in patients treated at CMEM implanting sites

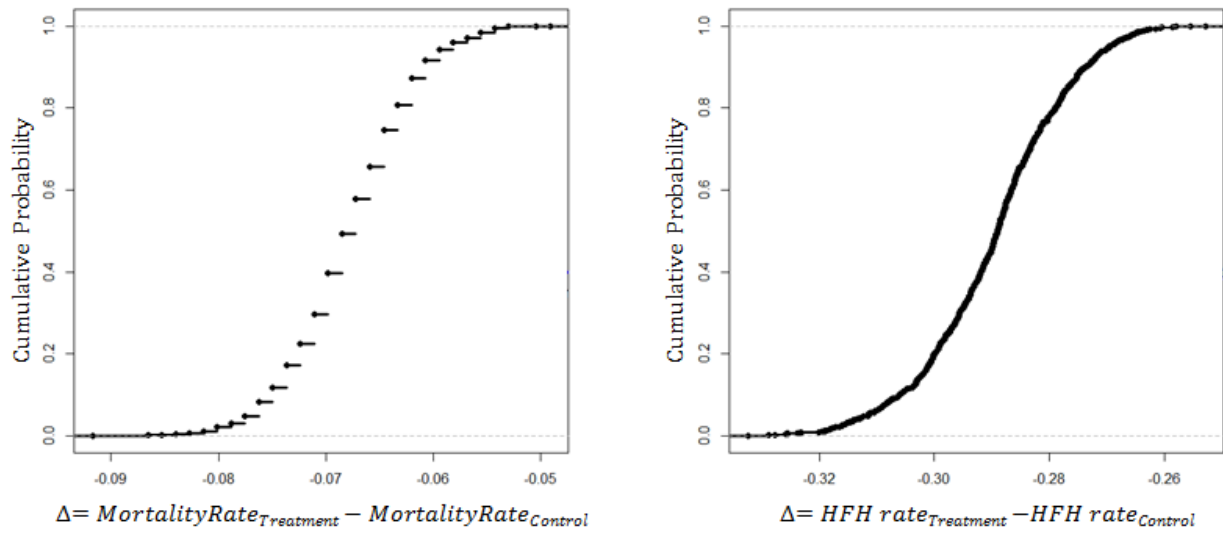

| Comparative Effectiveness of PAP Sensor-Based Management: Bootstrap Model |                            |                                  |                     |          |
|---------------------------------------------------------------------------|----------------------------|----------------------------------|---------------------|----------|
| Primary Endpoints                                                         | Treatment Cohort (n = 774) | Control Cohort [IQR] (n = 8,973) | Relative Risk [IQR] | p-value  |
| HF Hospitalization — HFH/yr                                               | 0.52                       | 0.81 [0.80 0.84]                 | 0.64 [0.63 0.66]    | p < 0.01 |
| Mortality — Death/yr                                                      | 0.22                       | 0.28 [0.27 0.29]                 | 0.76 [0.74 0.79]    | p < 0.01 |
